# Supplementary material for: Aluminium in Brain Tissue in Multiple Sclerosis
Source: PubMed Central journal article supplement (PMC6121957; doi:10.3390/ijerph15081777), 2018-08-18
Supplement: ijerph-15-01777-s001.pdf [file ijerph-15-01777-s001.pdf]

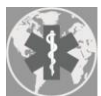

Supplementary material

## Aluminium in Brain Tissue in Multiple Sclerosis

Matthew Mold <sup>1</sup>, Agata Chmielecka <sup>2</sup>, Maria Raquel Ramirez Rodriguez <sup>1</sup>, Femia Thom <sup>2</sup>,  
Caroline Linhart <sup>3</sup>, Andrew King <sup>4</sup> and Christopher Exley <sup>1,\*</sup>

<sup>1</sup> The Birchall Centre, Lennard-Jones Laboratories, Keele University, UK; m.j.mold@keele.ac.uk (M.M.); raquel.ramirez3@hotmail.com (M.R.R.R.)

<sup>2</sup> Life Sciences, The Huxley Building, Keele University, UK; aggychmi@gmail.com (A.C.); femiathom@hotmail.com (F.T.)

<sup>3</sup> Department of Medical Statistics, Informatics and Health Economics, Medical University of Innsbruck, Austria; Linhart.Caroline@i-med.ac.at

<sup>4</sup> Department of Clinical Neuropathology, Kings College Hospital, London, UK; andrewking@nhs.net

\* Correspondence: c.exley@keele.ac.uk

Received: 25 July 2018; Accepted: 15 August 2018; Published: date

**Supplementary Figure 1. Brain tissue found negative for the presence of aluminium when stained with lumogallion.**

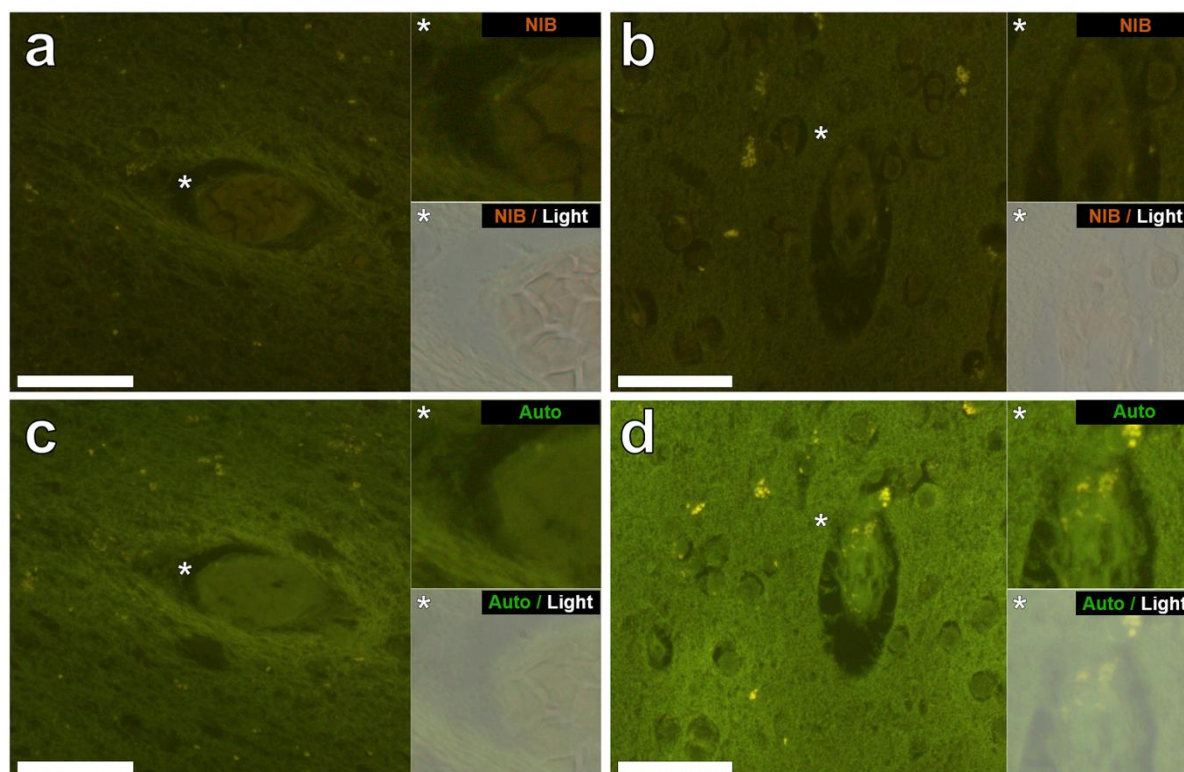

Supplementary Figure 1. Representative negative lumogallion staining of white and grey matter of the occipital lobe of a 56-year-old male donor (MS274), diagnosed with RRMS. Lumogallion staining of white (a) and grey (b) matter of the hippocampus produced dull brown fluorescence associated with blood vessels and distinguishable from yellow punctate fluorescence of lipofuscin deposits. Green autofluorescence was observed in adjacent non-stained serial sections (c & d). Upper and lower panels depict magnified inserts of the fluorescence channel and the bright field overlay. Magnification X 400, scale bars: 50 $\mu$ m.

**Supplementary Tables 1 – 14. Tables include aluminium data (µg/g dry wt.) for all measured tissues for each lobe for each MS donor.**

**Table S1.** MS307 (Male, 55 PPMS)

| Frontal     | Temporal    | Occipital | Parietal    |
|-------------|-------------|-----------|-------------|
| 2.00        | 1.08        | NA        | 0.52        |
| 3.25        | 0.01        |           | 2.36        |
| 1.20        | 0.69        |           | 0.49        |
| 1.20        | 1.34        |           | 3.67        |
| 1.12        | 0.67        |           | 2.47        |
|             | 0.01        |           | 1.03        |
|             | 0.42        |           |             |
|             | 0.01        |           |             |
|             | 0.01        |           |             |
|             | 0.01        |           |             |
|             | 0.01        |           |             |
|             | 0.01        |           |             |
|             | 1.76        |           |             |
| 1.75 (0.91) | 0.46 (0.60) |           | 1.76 (1.28) |

**Table S2.** MS107 (Male, 38 RPMS)

| Frontal     | Temporal    | Occipital   | Parietal     |
|-------------|-------------|-------------|--------------|
| 0.18        | 0.01        | 0.55        | 3.29         |
| 7.92        | 1.28        | 0.61        | 2.66         |
| 6.51        | 0.49        |             | 6.04         |
| 1.60        |             |             | 2.57         |
| 0.85        |             |             | 40.56        |
|             |             |             | 12.80        |
|             |             |             | 7.97         |
|             |             |             | 0.15         |
|             |             |             | 6.85         |
|             |             |             | 7.77         |
|             |             |             | 63.13        |
|             |             |             | 0.01         |
|             |             |             | 0.01         |
|             |             |             | 8.26         |
|             |             |             | 0.56         |
|             |             |             | 2.75         |
|             |             |             | 1.81         |
| 3.41 (3.54) | 0.59 (0.64) | 0.58 (0.04) | 9.84 (16.70) |

**Table S3.** MS245 (Male, 64 SPMS)

| Frontal     | Temporal | Occipital | Parietal |
|-------------|----------|-----------|----------|
| 2.75        |          |           |          |
| 2.73        |          |           |          |
| 3.93        |          |           |          |
| 2.01        |          |           |          |
| 2.86 (0.80) |          |           |          |

**Table S4.** MS274 (Male, 56 RRMS)

| Frontal       | Temporal    | Occipital   | Parietal    |
|---------------|-------------|-------------|-------------|
| 132.64        | 6.52        | 1.43        | 0.52        |
| 7.48          | 4.13        | 1.67        | 0.42        |
| 0.47          | 1.69        | 0.37        | 0.13        |
| 3.61          | 0.34        | 0.14        |             |
| 1.51          | 3.03        | 0.01        |             |
|               | 2.36        | 0.39        |             |
|               | 1.73        | 0.18        |             |
|               | 3.47        | 0.12        |             |
|               | 1.91        | 0.35        |             |
|               | 1.43        | 0.34        |             |
|               | 3.08        |             |             |
|               | 7.37        |             |             |
|               | 8.84        |             |             |
| 29.14 (57.92) | 3.53 (2.55) | 0.50 (0.57) | 0.36 (0.20) |

**Table S5.** MS330 (Female, 59 SPMS)

| Frontal     | Temporal | Occipital | Parietal |
|-------------|----------|-----------|----------|
| 0.55        |          |           |          |
| 4.43        |          |           |          |
| 1.17        |          |           |          |
| 3.00        |          |           |          |
| 0.94        |          |           |          |
| 2.02 (1.64) |          |           |          |

**Table S6.** MS317 (Female, 48 SPMS)

| Frontal     | Temporal | Occipital | Parietal |
|-------------|----------|-----------|----------|
| 1.91        |          |           |          |
| 13.73       |          |           |          |
| 1.32        |          |           |          |
| 9.18        |          |           |          |
| 1.05        |          |           |          |
| 5.44 (5.73) |          |           |          |

**Table S7.** MS304 (Male, 52 SPMS)

| Frontal | Temporal | Occipital | Parietal |
|---------|----------|-----------|----------|
| 2.90    | NA       | 3.47      | NA       |
| 3.65    |          | 1.88      |          |
| 1.38    |          | 0.01      |          |
| 0.68    |          | 1.83      |          |
| 0.47    |          | 3.15      |          |
|         |          | 1.19      |          |
|         |          | 1.19      |          |
|         |          | 8.09      |          |
|         |          | 1.91      |          |
|         |          | 3.85      |          |
|         |          | 1.10      |          |
|         |          | 0.21      |          |
|         |          | 1.84      |          |
|         |          | 52.98     |          |

7.63  
 1.14  
 1.00  
 2.89  
 7.13  
 0.48  
 2.30  
 1.67  
 0.42  
 1.02  
 1.11  
 1.16  
 0.22  
 0.61

1.82 (1.40)                      3.98 (9.84)

**Table S8.** MS356 (Female, 45 SPMS)

| Frontal | Temporal | Occipital | Parietal |
|---------|----------|-----------|----------|
| 6.84    | 1.75     | 0.18      | 0.01     |
| 0.29    | 1.46     | 0.32      | 1.17     |
| 1.46    | 0.19     | 0.49      | 0.01     |
| 0.01    | 4.81     | 1.25      | 0.01     |
| 0.61    | 0.84     | 0.05      | 0.01     |
|         |          | 0.95      | 1.72     |
|         |          | 1.79      | 1.92     |
|         |          | 1.09      | 7.21     |
|         |          | 1.73      |          |
|         |          | 0.38      |          |
|         |          | 2.53      |          |
|         |          | 0.23      |          |
|         |          | 7.07      |          |
|         |          | 0.28      |          |
|         |          | 0.01      |          |
|         |          | 4.00      |          |

1.84 (2.85)    1.81 (1.78)    1.40 (1.86)    1.51 (2.44)

**Table S9.** MS401 (Female, 82 SPMS)

| Frontal | Temporal | Occipital | Parietal |
|---------|----------|-----------|----------|
| 0.47    | 1.21     | 0.40      | 4.87     |
| 1.56    | 0.18     | 0.62      | 3.69     |
| 0.01    | 1.95     | 0.65      | 1.96     |
| 0.55    | 1.11     | 1.58      | 1.30     |
|         | 0.52     | 0.59      | 0.71     |
|         | 0.60     | 1.33      | 4.25     |
|         | 0.50     | 1.87      | 1.21     |
|         | 1.19     | 1.61      | 0.91     |
|         | 0.36     | 7.12      |          |
|         | 8.05     | 29.32     |          |
|         | 1.13     | 0.88      |          |
|         | 4.10     | 0.70      |          |
|         | 0.60     | 2.44      |          |
|         | 1.54     | 0.20      |          |
|         | 0.96     | 27.87     |          |
|         | 0.83     | 2.33      |          |

0.01  
0.36  
14.90  
18.42

0.65 (0.65) 1.55 (1.96) 5.66 (9.27) 2.36 (1.65)

**Table S10.** MS180 (Female, 44 SPMS)

| Frontal     | Temporal | Occipital | Parietal |
|-------------|----------|-----------|----------|
| 0.59        | NA       | NA        | NA       |
| 1.17        |          |           |          |
| 1.72        |          |           |          |
| 9.68        |          |           |          |
| 3.52        |          |           |          |
| 3.34 (3.71) |          |           |          |

**Table S11.** MS313 (Male, 66 PPMS)

| Frontal     | Temporal | Occipital   | Parietal    |
|-------------|----------|-------------|-------------|
| 0.34        | NA       | 8.70        | 0.99        |
| 0.01        |          | 3.11        | 0.01        |
| 0.01        |          | 0.32        | 1.01        |
| 1.53        |          | 10.30       | 0.01        |
| 0.45        |          | 3.47        | 0.01        |
|             |          | 1.85        | 0.01        |
|             |          | 5.15        | 0.01        |
|             |          | 5.39        | 0.01        |
|             |          | 18.13       | 0.01        |
|             |          | 3.68        | 14.24       |
|             |          | 1.71        | 0.95        |
|             |          | 0.56        | 1.02        |
|             |          | 1.22        | 0.01        |
|             |          | 1.59        | 0.01        |
|             |          | 3.50        | 4.30        |
|             |          | 0.12        | 1.83        |
|             |          | 3.16        | 0.01        |
|             |          | 0.68        | 0.29        |
|             |          | 0.01        | 0.01        |
|             |          | 0.23        | 0.78        |
| 0.47 (0.63) |          | 3.64 (4.41) | 1.28 (3.22) |

**Table S12.** MS114 (Female, 52 SPMS)

| Frontal | Temporal | Occipital | Parietal |
|---------|----------|-----------|----------|
| 0.53    | 1.15     | NA        | 0.26     |
| 1.40    | 0.36     |           | 0.28     |
| 3.70    | 1.78     |           | 0.41     |
| 1.95    | 1.92     |           | 0.10     |
| 0.82    | 17.61    |           | 0.92     |
|         | 1.31     |           | 1.55     |
|         | 0.72     |           |          |
|         | 0.01     |           |          |
|         | 0.01     |           |          |
|         | 8.24     |           |          |
|         | 5.94     |           |          |

0.51  
 4.17  
 6.67  
 2.17  
 3.48  
 2.54

1.68 (1.25) 3.45 (4.38) 0.59 (0.55)

**Table S13.** MS203 (Female, 53 SPMS)

| Frontal     | Temporal    | Occipital | Parietal    |
|-------------|-------------|-----------|-------------|
| 2.50        | 1.00        | NA        | 6.13        |
| 1.30        | 0.17        |           | 0.49        |
| 1.39        | 1.41        |           |             |
| 4.61        | 0.62        |           |             |
| 2.15        | 1.03        |           |             |
|             | 0.47        |           |             |
|             | 0.94        |           |             |
| 2.39 (1.34) | 0.81 (0.41) |           | 3.31 (4.00) |

**Table S14.** MS234 (Female 39, RPMS)

| Frontal     | Temporal | Occipital   | Parietal    |
|-------------|----------|-------------|-------------|
| 2.67        | NA       | 0.65        | 3.21        |
| 2.11        |          | 1.37        | 0.90        |
| 21.12       |          | 1.13        | 1.14        |
| 3.09        |          | 0.24        | 9.69        |
| 2.74        |          | 0.31        | 0.84        |
|             |          |             | 7.52        |
|             |          |             | 5.02        |
|             |          |             | 1.14        |
|             |          |             | 2.49        |
|             |          |             | 0.01        |
|             |          |             | 0.01        |
|             |          |             | 3.70        |
|             |          |             | 0.01        |
|             |          |             | 2.12        |
|             |          |             | 0.01        |
|             |          |             | 0.34        |
|             |          |             | 4.09        |
|             |          |             | 4.25        |
|             |          |             | 6.57        |
| 6.35 (8.27) |          | 0.74 (0.50) | 2.79 (2.83) |
